# Supplementary material for: Disturbing microtubule-endoplasmic reticulum dynamics by gold nanoclusters for improved triple-negative breast cancer treatment
Source: Royal Society of Chemistry journal article supplement (doi:10.1039/d4tb01492h), 2024-01-01
Supplement: d4tb01492h1.pdf [file d4tb01492h1.pdf]

## Support Information

### **Disturbing Microtubule-Endoplasmic Reticulum Dynamics by Gold**

### **Nanoclusters for Improved Triple-Negative Breast Cancer Treatment**

Kai Cao,<sup>1,2,\*</sup> Kaidi Luo,<sup>1,2</sup> Liyuan Xue,<sup>1</sup> Wendi Huo,<sup>1</sup> Panpan Ruan,<sup>1</sup> Yilin Xue,<sup>1</sup>

Xiuxiu Yao,<sup>1</sup> Dongfang Xia,<sup>1</sup> Yichen Zheng<sup>1</sup> and Xueyun Gao<sup>1</sup>

<sup>1</sup>Department of Chemistry, College of Chemistry and Life Science, Center of Excellence for Environmental Safety and Biological Effects, Beijing University of Technology, Beijing 100124, China

<sup>2</sup>These authors contribute equally

\*Address correspondence to [kcao@bjut.edu.cn](mailto:kcao@bjut.edu.cn)

**Table S1.** Resources Table

| REAGENT or RESOURCE                                | SOURCE                     | IDENTIFIER |
|----------------------------------------------------|----------------------------|------------|
| Antibodies                                         |                            |            |
| Rabbit Anti-Phospho-PERK (Thr980)                  | Bioss Antibodies           | bs-23340R  |
| Rabbit Anti-PERK                                   | Bioss Antibodies           | bs-2469R   |
| Rabbit Anti-phospho-IRE1a (Ser 726)                | Bioss Antibodies           | bs-4308R   |
| Rabbit Anti-IRE1                                   | Bioss Antibodies           | bs-8680R   |
| Rabbit Anti-DDIT3 antibody                         | Bioss Antibodies           | bs-20669R  |
| Rabbit Anti-ATF4                                   | Bioss Antibodies           | bs-1531R   |
| Rabbit Anti-TNF $\alpha$                           | Bioss Antibodies           | bs-10802R  |
| Rabbit Anti-IL-6                                   | Bioss Antibodies           | bs-0782R   |
| Rabbit anti-actin                                  | Bioss Antibodies           | bs-10966R  |
| Mouse Anti-Tubulin Antibody                        | Beyotime                   | AF2827     |
| Alexa Fluor 594-labeled Goat Anti-Rabbit IgG (H+L) | Abcam                      | ab150080   |
| Alexa Fluor 488-labeled Goat Anti-Rabbit IgG (H+L) | Abcam                      | ab150077   |
| Alexa Fluor 647-labeled Goat Anti-Mouse IgG (H+L)  | Beyotime                   | A0473      |
| HRP-labeled Goat Anti-Rabbit IgG (H+L)             | Beyotime                   | A0208      |
| Chemicals, peptides, and recombinant proteins      |                            |            |
| GSH peptide                                        | Sigma-Aldrich              |            |
| Docetaxel                                          | MedChemExpress             | HY-B0011   |
| Calcein AM                                         | Beyotime                   | C2012      |
| Propidium Iodide Staining Solution                 | Biosciences (BD)           | 556463     |
| SuperSignal West Pico PLUS                         | Thermo Fisher Scientific   | 34580      |
| Nitric acid                                        | Sinopharm Chemical Reagent | 010043     |
| 30% hydrogen peroxide                              | Sinopharm Chemical Reagent | 10011208   |
| Hydrochloric acid                                  | Sinopharm Chemical         | 10011018   |

|                                                  | Reagent  |         |
|--------------------------------------------------|----------|---------|
| Cell Counting Kit-8                              | Beyotime | C0038   |
| Saponin                                          | Beyotime | ST2618  |
| Rnase A                                          | Beyotime | ST578   |
| Methylcellulose                                  | Aladdin  | M112865 |
| DAPI staining solution                           | Beyotime | C1005   |
| DAB Horseradish Peroxidase Color Development Kit | Beyotime | P0202   |

**Table S2.** The primer sequences used in the study

| Gene                 | Forward primer<br>(5'→3')  | Reverse prime<br>(5'→3')      |
|----------------------|----------------------------|-------------------------------|
| ATF4                 | GTGGATGGGTTGGTCAGTCCC<br>T | AGGGCATCCAAGTCGAACTCC<br>T    |
| Ddit3<br>(CHOP)      | CTGCCTTTCACCTTGGAGAC       | CGTTTCCTGGGGATGAGATA          |
| Ppp1r15a<br>(GADD34) | TTT TGG CAA CCA GAA CCG    | GGA GAT AGA AGT TGT GGG<br>CG |
| GAPDH                | AGGTCGGTGTGAACGGATTTG      | GGGGTCGTTGATGGCAACA           |

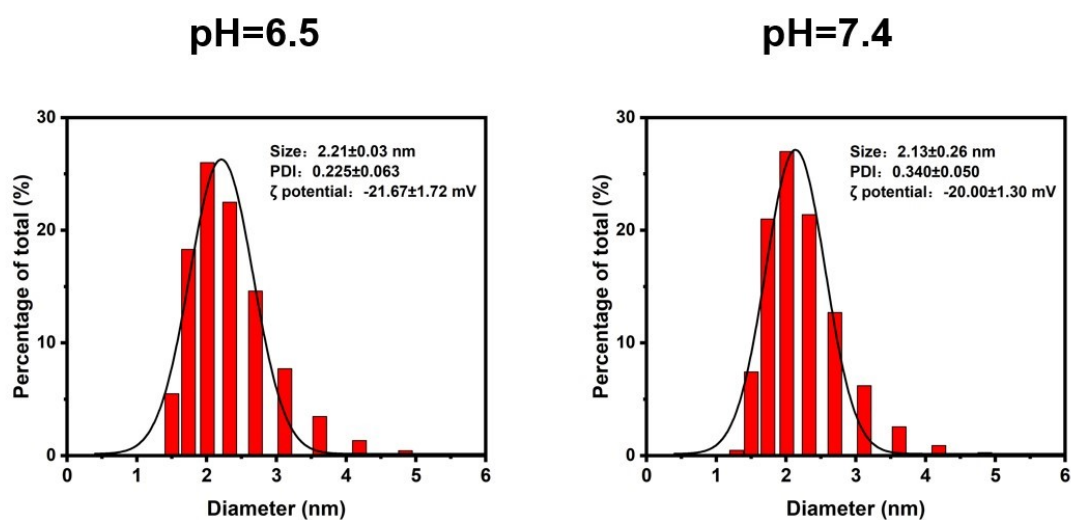

**Figure S1.** The size distribution, PDI and zeta potential of GA in solutions with pH of 6.5 (left) and 7.4 (right).

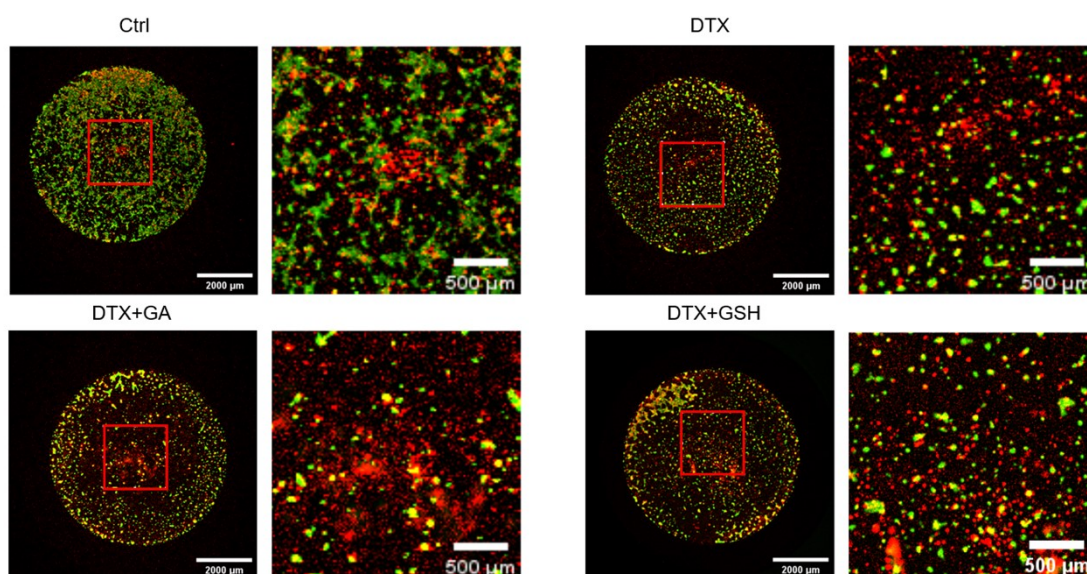

**Figure S2.** Enlarged picture of selected regions in Figure 2B.

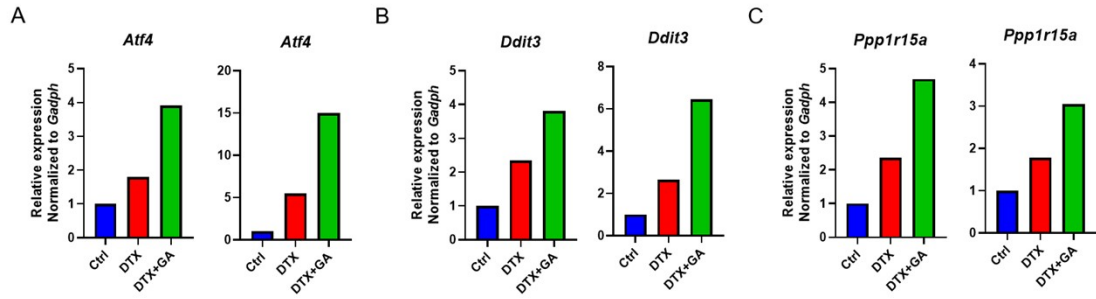

**Figure S3.** The mRNA levels of *Atf4* (ATF4, A), *Ddit3* (CHOP, B) and *Ppp1r15a* (GADD34, C) of 4T1 cells by indicated treatment.

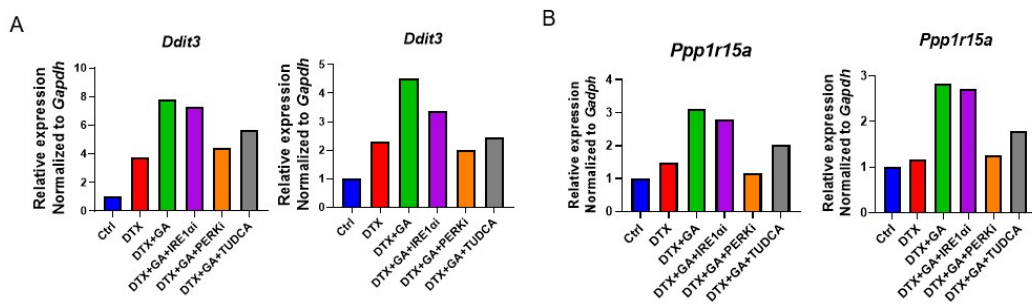

**Figure S4.** The mRNA levels of *Ddit3* (CHOP, A) and *Ppp1r15a* (GADD34, B) of 4T1 cells by indicated treatment.

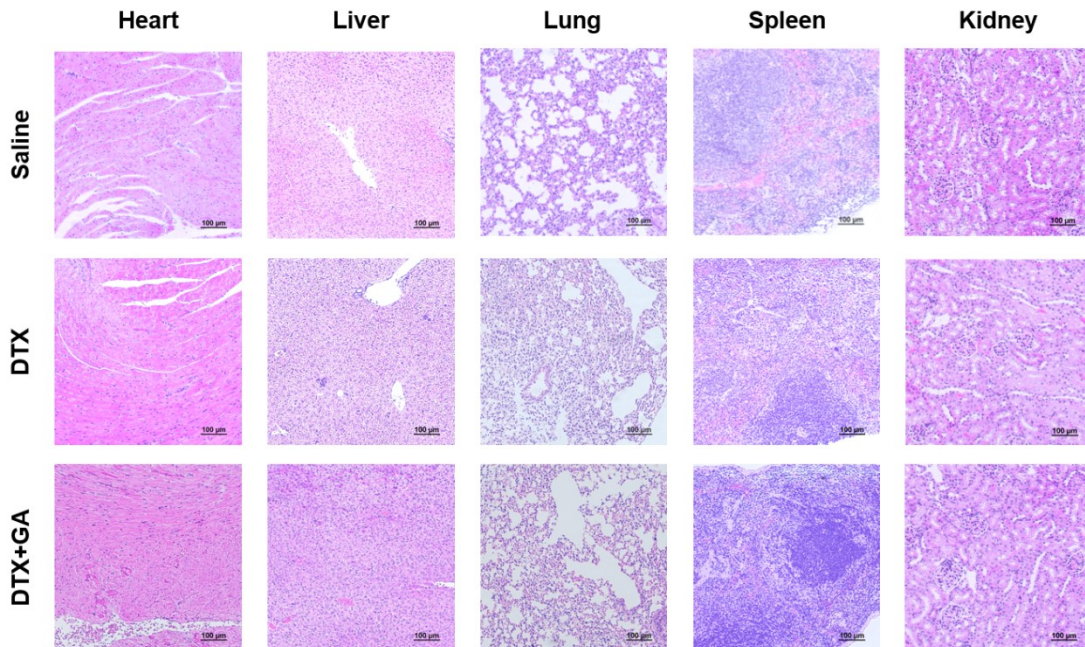

**Figure S5.** The HE staining of the main organs from tumor-bearing mice treated with indicated stimulus. Scale bar=100 µm.
